# Supplementary material for: Efficacy and safety of follitropin alfa/lutropin alfa in ART: a randomized controlled trial in poor ovarian responders
Source: PubMed Central journal article supplement (PMC5850777; doi:10.1093/humrep/dew360), 2017-01-28
Supplement: dew360suppl_table1.pdf [file dew360suppl_table1.pdf]

**Supplementary Table S1** Baseline demographics and characteristics of patients with at least 10 oocytes retrieved (ITT population).

| No. of oocytes retrieved | Age (years) | Duration of infertility (years) | AMH level (ng/ml) | AFC | No. of previous ART cycles | No. of oocytes retrieved in previous ART cycles (range) | No. of oocytes retrieved in most recent ART cycle | No. of previous live births |
|--------------------------|-------------|---------------------------------|-------------------|-----|----------------------------|---------------------------------------------------------|---------------------------------------------------|-----------------------------|
| r-hFSH/r-hLH             |             |                                 |                   |     |                            |                                                         |                                                   |                             |
| 10                       | 34          | 7.6                             | 0.13              | 10  | 1                          | 3                                                       | 3                                                 | 1                           |
| 13                       | 41          | 1.0                             | 0.17              | 6   | N/A                        | N/A                                                     | N/A                                               | 1                           |
| 15                       | 40          | 4.5                             | 0.15              | 8   | 1                          | 9                                                       | 9                                                 | 0                           |
| 11                       | 41          | 3.0                             | 0.19              | 9   | 3                          | 2–13                                                    | 2                                                 | 1                           |
| 12                       | 40          | 8.2                             | 0.14              | 11  | 1                          | 12                                                      | 12                                                | 0                           |
| 12                       | 31          | 1.2                             | 0.13              | 8   | 2                          | 3–7                                                     | 7                                                 | 1                           |
| 14                       | 40          | 3.0                             | 0.34              | 0   | 1                          | 1                                                       | 1                                                 | 0                           |
| 13                       | 40          | 4.5                             | 0.71              | 9   | 1                          | 2                                                       | 2                                                 | 0                           |
| 11                       | 32          | 1.0                             | 0.10              | 9   | 1                          | 2                                                       | 2                                                 | 0                           |
| 10                       | 38          | 4.0                             | 0.15              | 7   | 1                          | 1                                                       | 1                                                 | 0                           |
| 11                       | 40          | 3.0                             | 0.13              | 8   | 1                          | 3                                                       | 3                                                 | 0                           |
| 10                       | 34          | 1.2                             | N/A               | 3   | 1                          | 1                                                       | 1                                                 | 0                           |
| r-hFSH                   |             |                                 |                   |     |                            |                                                         |                                                   |                             |
| 14                       | 41          | 2.2                             | 0.36              | 7   | 2                          | 2–4                                                     | 4                                                 | 0                           |
| 12                       | 41          | 4.7                             | 0.50              | 6   | 2                          | 2–9                                                     | 9                                                 | 0                           |
| 10                       | 39          | 3.0                             | 0.11              | 7   | 2                          | 3–4                                                     | 3                                                 | 1                           |
| 13                       | 40          | 2.0                             | 0.13              | 12  | 2                          | 3–7                                                     | 3                                                 | 0                           |
| 10                       | 36          | 10.0                            | 0.12              | 2   | 2                          | 1–2                                                     | 2                                                 | 0                           |
| 13                       | 40          | 2.0                             | 0.15              | 4   | 2                          | 1–3                                                     | 1                                                 | 0                           |
| 11                       | 40          | 2.3                             | 0.07              | 7   | 1                          | 7                                                       | 7                                                 | 0                           |
| 11                       | 40          | 3.8                             | 0.27              | 6   | 1                          | 0                                                       | 0                                                 | 0                           |
| 11                       | 41          | 2.0                             | 0.23              | 8   | 1                          | 3                                                       | 3                                                 | 0                           |
| 13                       | 30          | 4.0                             | 0.09              | 3   | 4                          | 3                                                       | 3                                                 | 0                           |
| 12                       | 40          | 8.1                             | 0.29              | 10  | 2                          | 3                                                       | 3                                                 | 1                           |
| 12                       | 41          | 15.1                            | 0.25              | 14  | 3                          | 3                                                       | 3                                                 | 0                           |
| 16                       | 41          | 6.9                             | 0.16              | 10  | 1                          | 3                                                       | 3                                                 | 2                           |
| 11                       | 41          | 4.0                             | 0.38              | 4   | 1                          | 3                                                       | 3                                                 | 2                           |
| 10                       | 41          | 2.2                             | 0.06              | 9   | 2                          | 5–8                                                     | 5                                                 | 0                           |
| 10                       | 41          | 2.0                             | 0.09              | 8   | 3                          | 3–12                                                    | 4                                                 | 0                           |
| 13                       | 40          | 2.3                             | 0.07              | 5   | 3                          | 0–8                                                     | 8                                                 | 0                           |
| 11                       | 41          | 2.0                             | 0.19              | 4   | N/A                        | N/A                                                     | N/A                                               | 0                           |
| 10                       | 41          | 0.4                             | 0.11              | 5   | 1                          | 6                                                       | 6                                                 | 0                           |
| 10                       | 40          | 4.0                             | 0.18              | 8   | 2                          | 1–4                                                     | 1                                                 | 0                           |
| 10                       | 31          | 9.1                             | 0.10              | 3   | 1                          | 3                                                       | 3                                                 | 0                           |

AFC, antral follicle count; AMH, anti-Müllerian hormone; ITT, intention-to-treat; N/A, not available; No., number; r-hFSH, recombinant human FSH; r-hLH, recombinant human LSH.
